# Supplementary material
Source: PubMed Central journal article supplement (PMC4013249)
Supplement: NIHMS573059-supplement-01.pdf [file NIHMS573059-supplement-01.pdf]

**Table e-1. Prevalence of single- and multiple-domain PD-MCI in the PANUC clinical consortium when two impaired tests in each domain are required for both subtypes**

| <b>PD-MCI Subtype</b>  | <b>Frequency</b> | <b>%</b> |
|------------------------|------------------|----------|
| Not classified         | 24               | 25.3     |
| Single Domain PD-MCI   | 42               | 44.2     |
| Multiple Domain PD-MCI | 29               | 30.6     |

By applying more stringent criteria to the PD-MCI multiple-domain subtype than specified by Litvan et al. (2012), e.g., requiring two impaired tests in each domain, the proportion of participants with the single-domain subtype increases substantially, from 5% to 44%. In addition, using these criteria, 25% of the sample could not be classified as either single- or multiple-domain PD-MCI.
